# Supplementary material for: Metabolite marker discovery for the detection of bladder cancer by comparative metabolomics
Source: PubMed Central journal article supplement (PMC5503573; doi:10.18632/oncotarget.16393), 2017-03-21
Supplement: oncotarget-08-38802-s001.pdf [file oncotarget-08-38802-s001.pdf]

## Metabolite marker discovery for the detection of bladder cancer by comparative metabolomics

### SUPPLEMENTARY FIGURES AND TABLES

The product ion spectra of imidazoleacetic acid. In the following figures, imidazoleacetic acid was confirmed by its authentic standards.

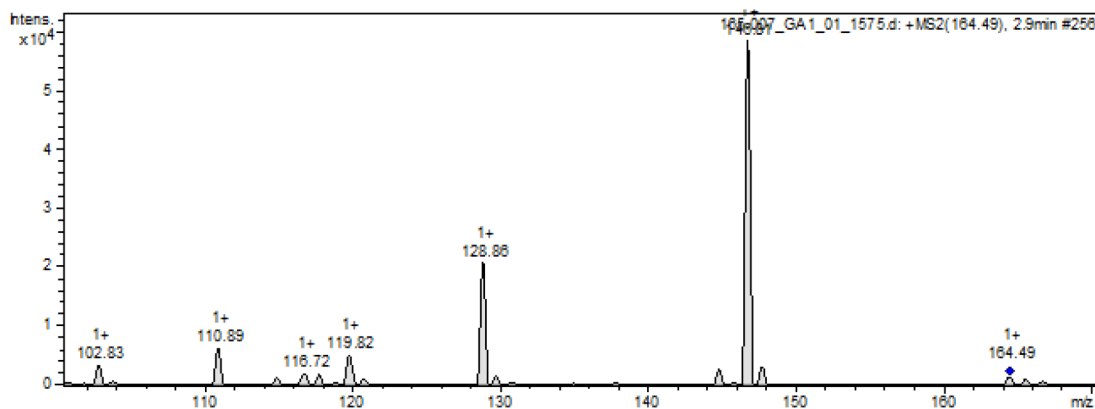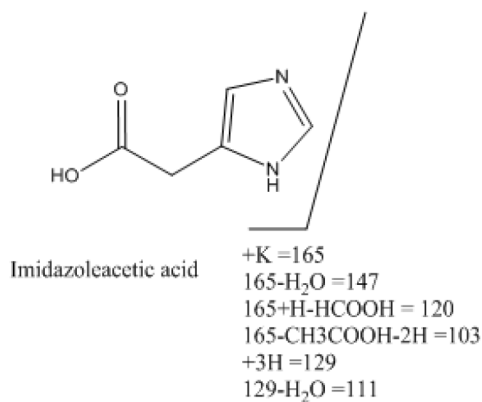

Supplementary Figure 1: The product ion spectra of 3.65min:165.007m/z.

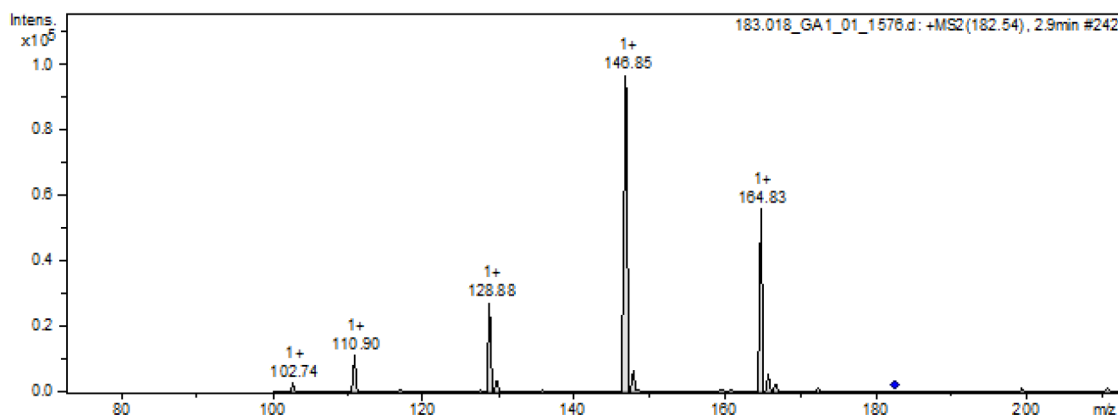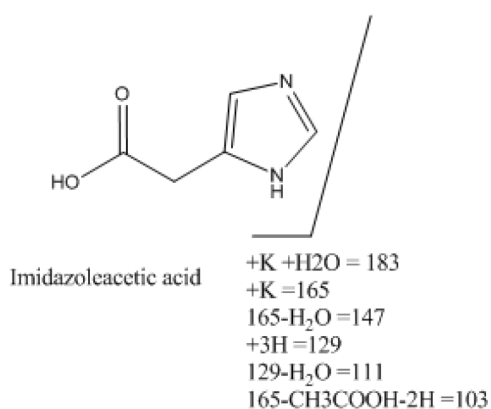

**Supplementary Figure 2:** The product ion spectra of 3.65min:183.018m/z.

**Supplementary Table 1:** The spectral raw data of bladder cancer patients #1 to #25.

See Supplementry File 1

**Supplementary Table 2:** The spectral raw data of bladder cancer patients #26 to #50.

See Supplementry File 2

**Supplementary Table 3:** The spectral raw data of bladder cancer patients #51 to #75.

See Supplementary File 3

**Supplementary Table 4:** The spectral raw data of bladder cancer patients #76 to #87.

See Supplementary File 4

**Supplementary Table 5: The spectral raw data of hernia patients #1 to #25.**

**See Supplementary File 5**

**Supplementary Table 6: The spectral raw data of hernia patients #26 to #50.**

**See Supplementary File 6**

**Supplementary Table 7: The spectral raw data of hernia patients #51 to #65.**

**See Supplementary File 7**
